# Supplementary material
Source: PubMed Central journal article supplement (PMC7020193)
Supplement: ja9b11468_si_001.pdf [file ja9b11468_si_001.pdf]

*Supporting information*

## **Multiphase Complex Coacervate Droplets**

Tiemei Lu and Evan Spruijt\*

*Radboud University, Institute for Molecules and Materials, Heyendaalseweg 135, 6525 AJ  
Nijmegen, the Netherlands*

## Extended methods

### Polymers

- Poly(diallyl dimethylammonium chloride) (**PDDA**, 200-350 kDa, 20 wt% solution in H<sub>2</sub>O) was purchased from Sigma and diluted with Milli-Q water to at a stock concentration of 50 mg/mL (0.31 M in monomer units).
- Poly(allylamine hydrochloride) (**PAH**, 58 kDa) was purchased from Sigma and dissolved in Milli-Q water at a stock concentration of 10 mg/mL (0.11 M in monomer units). Tetramethylrhodamine labeled PAH (PAH-TAMRA) was prepared by carbodiimide mediated coupling reaction with EDC and NHS following a previous report.<sup>1</sup> The molar ratio of TAMRA:EDC:NHS = 1:1.5:1.5 and the volume of DMSO was 10% of the total reaction volume.
- Dextran sulfate sodium salt (**S-Dex**, from *Leuconostoc* spp., 9-20 kDa) was purchased from Sigma and dissolved in Milli-Q water at a concentration of 100 mg/mL.
- Poly(acrylic acid) (**PAA**, 15 kDa, 35 wt% solution in H<sub>2</sub>O) was diluted by Milli-Q water to a concentration of 61 mg/mL.
- Adenosine 5'-triphosphate disodium salt hydrate (**ATP**) was freshly dissolved in Milli-Q water at a concentration of 100 mM and kept on ice throughout the experiments.
- Poly-L-lysine hydrobromide (**PLys**, 52 kDa) was purchased from Alamanda polymers and was dissolved in Milli-Q water at a concentration of 50 mg/mL (0.24 M in monomer units). Tetramethylrhodamine labeled PLys (PLys-TAMRA) was prepared in the same way as PAH-TAMRA.
- Trimethylated poly-L-lysine (**PLys(Me)<sub>3</sub>**) was prepared from PLys, according to a previously published article and was dissolved in Milli-Q water at a concentration of 100 mM.<sup>2</sup>
- Single-stranded DNA (**ssDNA**, 43 nt) was purchased from Biomers (sequence: GCCTCGAATCACTCCACTGAACCATCCTCTTGATCTTGTGAAC) and was dissolved in Milli-Q water at a concentration of 2.0 mg/mL. Alexa-647 labeled ssDNA was prepared according to a previously reported procedure.<sup>3</sup>
- Poly (2-(methacryloyloxy)ethyltrimethylammonium chloride) (**PMETAC**, 25 kDa, PDI 1.26) was prepared by living atom transfer radical polymerization as reported previously,<sup>4</sup> and dissolved in Milli-Q water at a concentration of 50 mg/mL (0.24 M in monomer units).
- Poly(3-sulfopropyl methacrylate) (**PSPMA**, 30 kDa, PDI 1.3) and PSPMA copolymer with 10 mol% fluorescein methacrylate (**PSPMA-FI**, 48 kDa, PDI 1.13) were prepared by living atom transfer radical polymerization as reported previously.<sup>4</sup> The polymers were dissolved in Milli-Q water at a concentration of 50 mg/mL (0.24 M in monomer units) and 10 mg/mL, respectively.
- Poly-D-glutamate (**PGlu**, 5.6 kDa, PDI 1.06) was prepared by free radical polymerization of O-benzyl-D-Glutamate-N-carboxyanhydride, followed by deprotection, as described elsewhere,<sup>5</sup> and was dissolved in Milli-Q water at a concentration of 13 mg/mL (0.1 M in monomer units).
- Glycidyl trimethylammonium chloride functionalized dextran (**Q-Dex**, 150 kDa) was prepared following a previous report,<sup>6</sup> and was dissolved in Milli-Q water at a concentration of 50 mg/mL.
- Diethylaminoethyl-functionalized dextran (**DEAE-Dex**, 150 kDa) was prepared following a previous report,<sup>7-8</sup> and was dissolved in Milli-Q water at a concentration of 50 mg/mL.
- GFP-K<sub>72</sub> (80 μM) was obtained by expression in *E.coli* and purification by affinity and size exclusion chromatograph as described previously.<sup>9</sup>

## Supplementary tables

**Table S1.** Molecular structures of polycations and polyanions.

| Negatively charged polymers | Structure | Positively charged polymers | Structure |
|-----------------------------|-----------|-----------------------------|-----------|
| PSPMA                       |           | PDDA                        |           |
| S-Dex                       |           | PLys(Me) <sub>3</sub>       |           |
| ATP                         |           | PMETAC                      |           |
| ssDNA                       |           | Q-Dex                       |           |
| PAA                         |           | DEAE-Dex                    |           |
| PGlu                        |           | PAH                         |           |
|                             |           | PLys                        |           |
|                             |           | GFP-K <sub>72</sub>         |           |

**Table S2.** Single complex coacervates.

| Coacervates formation |                                 |       | (poly) cation                 |                       |        |          |                                |     |                               |      |
|-----------------------|---------------------------------|-------|-------------------------------|-----------------------|--------|----------|--------------------------------|-----|-------------------------------|------|
|                       |                                 |       | -NR <sub>3</sub> <sup>+</sup> |                       |        |          | -NHR <sub>2</sub> <sup>+</sup> |     | -NH <sub>3</sub> <sup>+</sup> |      |
|                       |                                 |       | PDDA                          | PLys(Me) <sub>3</sub> | PMETAC | Q-Dex    | DEAE-Dex                       | PAH | GFP-K <sub>72</sub>           | PLys |
| (poly)<br>anion       | -SO <sub>3/4</sub> <sup>-</sup> | PSPMA | √                             | √                     | √      | √        | √                              | √   | √                             | √    |
|                       |                                 | S-Dex | √                             | √                     | √      | √        | /                              | ↓   | √                             | ↓    |
|                       | -PO <sub>4</sub> <sup>-</sup>   | ATP   | √                             | √                     | √      | solution | /                              | √   | √                             | √    |
|                       |                                 | ssDNA | √                             | √                     | √      | √        | /                              | √   | √                             | √    |
|                       |                                 | PAA   | √                             | √                     | √      | √        | /                              | √   | √                             | ↓    |
|                       | -CO <sub>2</sub> <sup>-</sup>   | PGlu  | √                             | √                     | √      | √        | /                              | √   | solution                      | √    |
|                       |                                 |       |                               |                       |        |          |                                |     |                               |      |

**Table S3.** Salt concentrations at which coacervates were prepared.

| Coacervates formation<br>NaCl concentration (M) |                                 |       | (poly) cation                 |                       |        |          |                                |       |                               |       |
|-------------------------------------------------|---------------------------------|-------|-------------------------------|-----------------------|--------|----------|--------------------------------|-------|-------------------------------|-------|
|                                                 |                                 |       | -NR <sub>3</sub> <sup>+</sup> |                       |        |          | -NHR <sub>2</sub> <sup>+</sup> |       | -NH <sub>3</sub> <sup>+</sup> |       |
|                                                 |                                 |       | PDDA                          | PLys(Me) <sub>3</sub> | PMETAC | Q-Dex    | DEAE-Dex                       | PAH   | GFP-K <sub>72</sub>           | PLys  |
| (poly)<br>anion                                 | -SO <sub>3/4</sub> <sup>-</sup> | PSPMA | 0.50                          | 0.50                  | 0.50   | 0.20     | 0.40                           | 1.0   | 0.20                          | 0.50  |
|                                                 |                                 | S-Dex | 1.0                           | 0.50                  | 0.50   | 0.40     | /                              | ↓     | 0.30                          | ↓     |
|                                                 | -PO <sub>4</sub> <sup>-</sup>   | ATP   | 0.050                         | 0.0060                | 0.020  | solution | /                              | 1.0   | 0.010                         | 0.040 |
|                                                 |                                 | ssDNA | 0.050                         | 0.040                 | 0.050  | 0.040    | /                              | 0.050 | 0.050                         | 0.050 |
|                                                 |                                 | PAA   | 0.30                          | 0.27                  | 0.30   | 0.15     | /                              | 1.0   | 0.15                          | ↓     |
|                                                 | -CO <sub>2</sub> <sup>-</sup>   | PGlu  | 0.20                          | 0.30                  | 0.30   | 0.15     | /                              | 0.60  | solution                      | 0.40  |
|                                                 |                                 |       |                               |                       |        |          |                                |       |                               |       |

**Table S4.** Multiphase complex coacervate droplets prepared from combinations in Table S2.

| No. | Coacervate 1                | Coacervate 2              | Coacervate 3 | Multiphase | Components |
|-----|-----------------------------|---------------------------|--------------|------------|------------|
| 1   | ssDNA/PLys(Me) <sub>3</sub> | ssDNA/GFP-K <sub>72</sub> | /            | Two        | 3          |
| 2   | ATP/PDDA                    | ATP/PAH                   | /            | Two        | 3          |
| 3   | PAA/PLys(Me) <sub>3</sub>   | PAA/GFP-K <sub>72</sub>   | /            | Two        | 3          |
| 4   | PGlu/PDDA                   | PGlu/PAH                  | /            | Two        | 3          |
| 5   | S-Dex/PLys(Me) <sub>3</sub> | S-Dex/GFP-K <sub>72</sub> | /            | Two        | 3          |
| 6   | PSPMA/PDDA                  | PSPMA/PAH                 | /            | Two        | 3          |
| 7   | PSPMA/DEAE-Dex              | PSPMA/PAH                 | /            | Two        | 3          |
| 8   | PSPMA/PDDA                  | PSPMA/Q-Dex               | /            | Two        | 3          |
| 9   | PSPMA/PDDA                  | ATP/PAH                   | /            | Two        | 4          |
| 10  | PSPMA/PLys(Me) <sub>3</sub> | PSPMA/PAH                 | /            | Two        | 3          |
| 11  | PSPMA/PMETAC                | PSPMA/PAH                 | /            | Two        | 3          |
| 12  | PSPMA/PLys(Me) <sub>3</sub> | PSPMA/GFP-K <sub>72</sub> | /            | Two        | 3          |

|    |                             |                           |                |       |   |
|----|-----------------------------|---------------------------|----------------|-------|---|
| 13 | PSPMA/PAH                   | PSPMA/PLys                | /              | Two   | 3 |
| 14 | PSPMA/Q-Dex                 | PSPMA/PAH                 | /              | Two   | 3 |
| 15 | PGlu/PLys(Me) <sub>3</sub>  | PGlu/PLys                 | /              | Two   | 3 |
| 16 | PSPMA/PMETAC                | PSPMA/PLys                | /              | Two   | 3 |
| 17 | PGlu/Q-Dex                  | PGlu/PLys                 | /              | Two   | 3 |
| 18 | PSPMA/PDDA                  | PAA/PDDA                  | /              | Two   | 3 |
| 19 | PSPMA/PLys(Me) <sub>3</sub> | PAA/PLys(Me) <sub>3</sub> | /              | Two   | 3 |
| 20 | PSPMA/PDDA                  | PGlu/PDDA                 | /              | Two   | 3 |
| 21 | PSPMA/PDDA                  | ATP/PAH                   | PAA/PDDA       | Three | 5 |
| 22 | PSPMA/PDDA                  | PSPMA/PAH                 | PSPMA/Q-Dex    | Three | 4 |
| 23 | PSPMA/PDDA                  | PSPMA/PAH                 | PSPMA/DEAE-Dex | Three | 4 |

**Table S5.** Critical salt concentrations of single complex coacervates.

| Critical NaCl<br>concentration (M) |                                 |       | (poly) cation                 |                       |        |         |                                |       |                               |       |
|------------------------------------|---------------------------------|-------|-------------------------------|-----------------------|--------|---------|--------------------------------|-------|-------------------------------|-------|
|                                    |                                 |       | -NR <sub>3</sub> <sup>+</sup> |                       |        |         | -NHR <sub>2</sub> <sup>+</sup> |       | -NH <sub>3</sub> <sup>+</sup> |       |
|                                    |                                 |       | PDDA                          | PLys(Me) <sub>3</sub> | PMETAC | Q-Dex   | DEAE-Dex                       | PAH   | GFP-K <sub>72</sub>           | PLys  |
| (poly)<br>anion                    | -SO <sub>3/4</sub> <sup>-</sup> | PSPMA | 1.0                           | 0.82                  | 1.0    | 0.36    | 0.69                           | 2.6   | 0.30                          | 1.2   |
|                                    |                                 | S-Dex | 1.6                           | 1.0                   | 1.7    | 0.42    | /                              | > 2.0 | 0.39                          | > 2.0 |
|                                    | -PO <sub>4</sub> <sup>-</sup>   | ATP   | 0.088                         | 0.010                 | 0.030  | < 0.020 | /                              | 2.4   | 0.050                         | 0.17  |
|                                    |                                 | ssDNA | 0.34                          | 0.21                  | 0.36   | < 0.020 | /                              | 1.6   | 0.11                          | 0.42  |
|                                    | -CO <sub>2</sub> <sup>-</sup>   | PAA   | 0.39                          | 0.36                  | 0.48   | 0.20    | /                              | > 3.6 | 0.27                          | /     |
|                                    |                                 | PGlu  | 0.36                          | 0.32                  | 0.38   | 0.14    | /                              | 2.8   | /                             | 0.87  |

## Supplementary figures

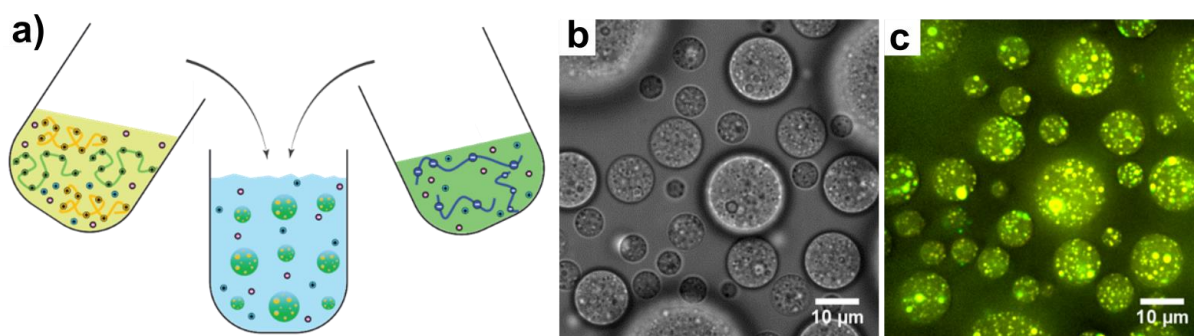

**Figure S1.** (a) Method 1 for preparing multiphase droplets by pre-mixing like-charged components, followed by combining them. (b,c) Bright-field and fluorescence images of PSPMA/PAH/PDDA multiphase droplets prepared with this method.

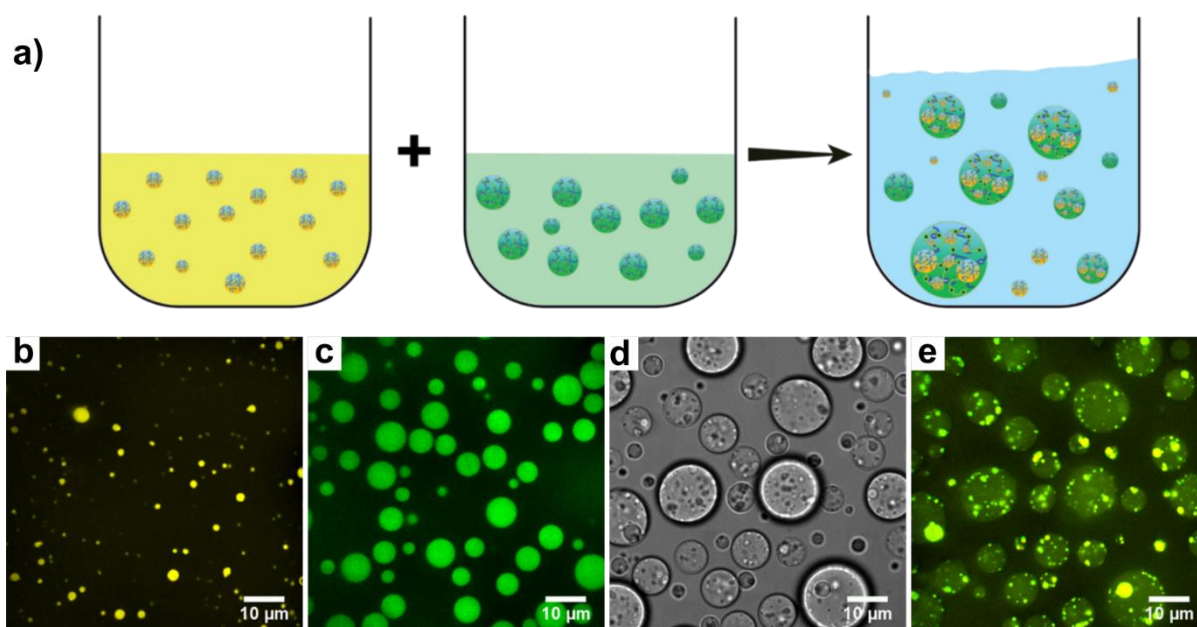

**Figure S2.** (a) Method 2 for preparing multiphase droplets by preparing single coacervates separately, followed by combining them. (b,c) Fluorescence images of the single coacervates of PSPMA/PAH and PSPMA/PDDA, respectively. (d,e) Bright-field and fluorescence images of the multiphase droplets prepared with this method.

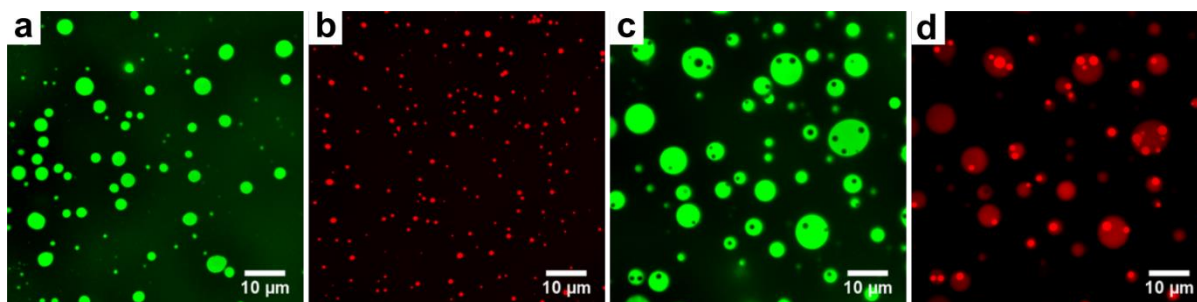

**Figure S3.** Single complex coacervates of (a) ssDNA/GFP-K<sub>72</sub> and (b) ssDNA/PLys(Me)<sub>3</sub>, and multiphase droplets shown in Figure 1b, obtained after combining (a) and (b), showing the separate channels for GFP-K<sub>72</sub> (c) and ssDNA (d).

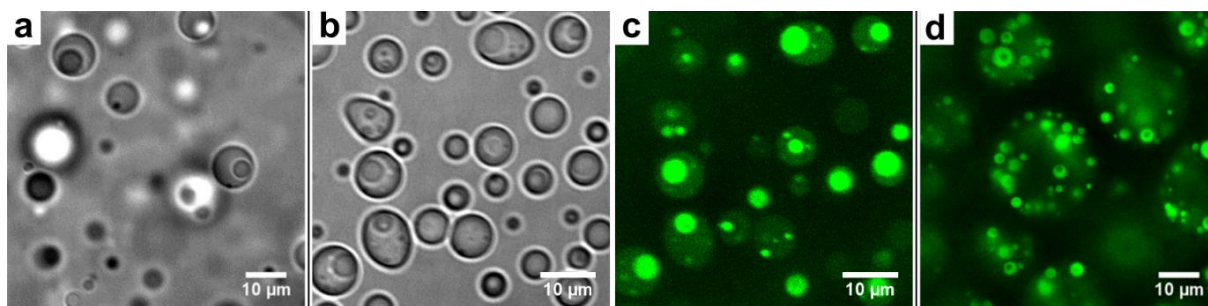

**Figure S4.** Multiphase coacervate droplets formed with two polyanions and a common polycation. (a) PSPMA/PLys(Me)<sub>3</sub> core coacervates in PAA/PLys(Me)<sub>3</sub> outer coacervate phases. (b,c) PSPMA/PDDA core coacervates in PGlu/PDDA outer phase coacervates visualized by bright-field (b) and fluorescence (c, PSPMA-FI) microscopy. (d) PSPMA/PDDA core coacervates in PAA/PDDA outer phase coacervates visualized by fluorescence microscopy (PSPMA-FI).

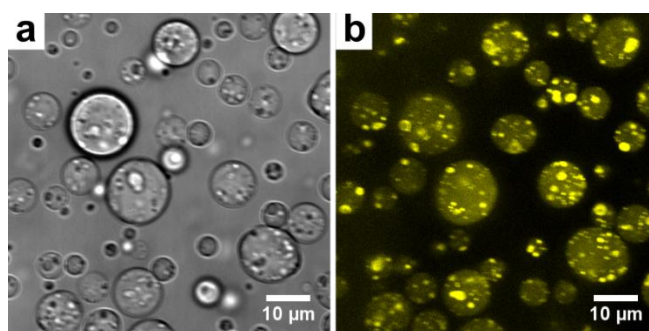

**Figure S5.** Multiphase coacervate droplets formed with a common polyanion and two primary amine polycations: PSPMA/PAH core coacervates in PSPMA/PLys outer phase coacervates, visualized by bright-field (a) and fluorescence (b, PAH-TAMRA) microscopy.

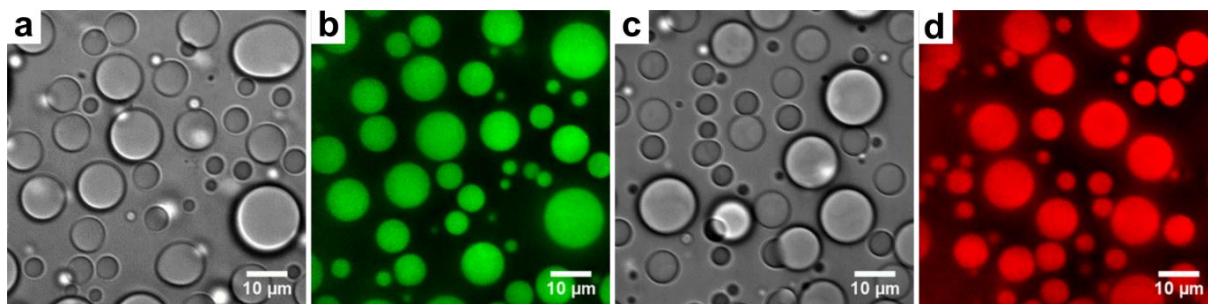

**Figure S6.** Single phase, mixed coacervate droplets formed after mixing two single phase coacervates with similar critical salt concentration. (a,b) PSPMA/PDDA and PSPMA/PMETAC, visualized by bright-field (a) and fluorescence (b, PSPMA-FI) microscopy. (c,d) S-Dex/PDDA and S-Dex/PMETAC, visualized by bright-field (c) and fluorescence (d, ThT) microscopy.

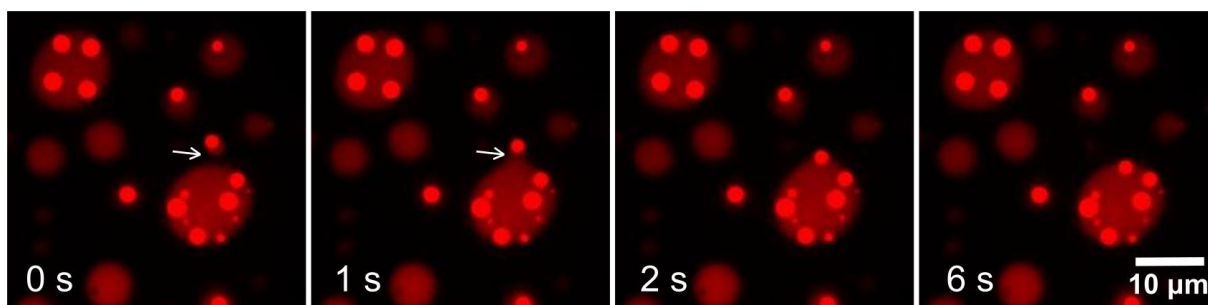

**Figure S7.** Engulfing of a ssDNA/PLys(Me)<sub>3</sub> coacervate by a ssDNA/GFP-K<sub>72</sub> coacervate (cf. Fig. 1b).



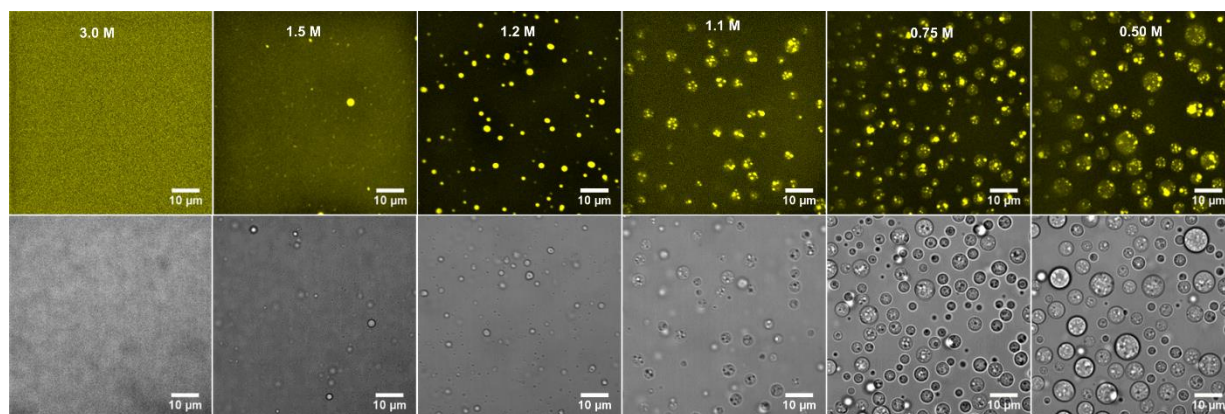

**Figure S8.** Step-wise condensation of PSPMA/PAH/PDDA multiphase droplets, shown by confocal fluorescence microscopy (top row) and bright-field (bottom row).

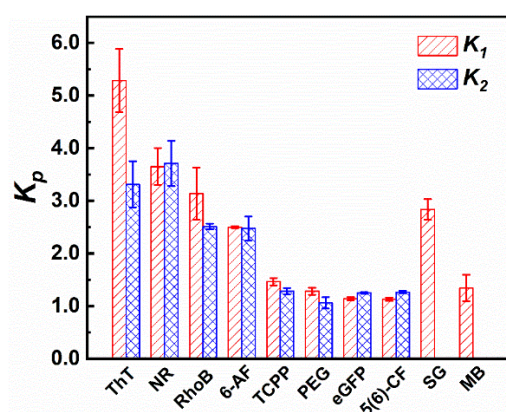

**Figure S9.** Partitioning coefficients of guest molecules shown in Figure 5 in the outer coacervate phase ( $K_1$ ) and between the core coacervate and outer coacervate phase ( $K_2$ ).

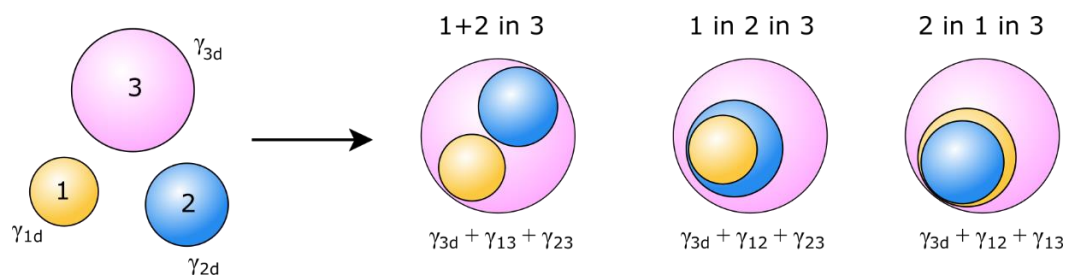

**Figure S10.** Schematic illustration of some of the possible arrangements of three immiscible coacervate phases. Coacervate 3 is assumed to have the lowest density and interfacial tension.



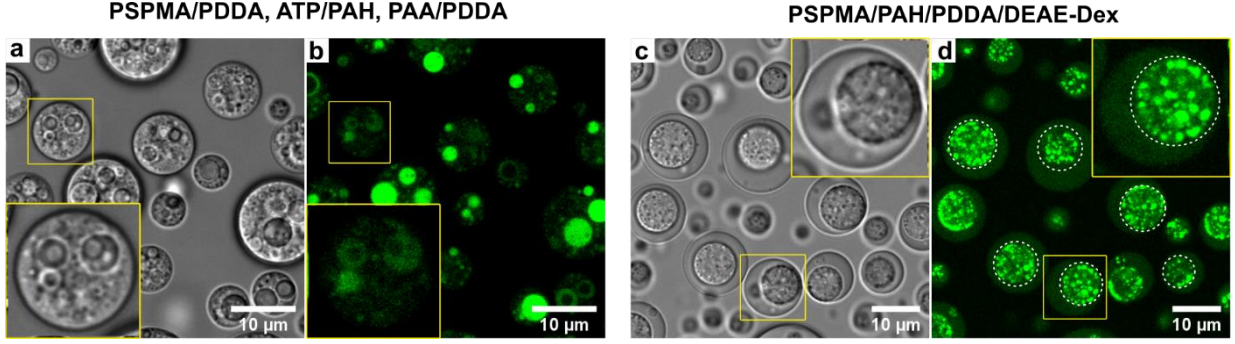

**Figure S11.** (a,b) An ATP/PAH inner core, surrounded by a PSPMA/PDDA shell in a PAA/PDDA outer coacervate phase (prepared by method 1). (c,d) PSPMA/PAH inner core, surrounded by a PSPMA/PDDA shell in a PSPMA/DEAE-Dex coacervate phase (prepared by method 1). All these samples are visualized at the same position in bright-field (a,c) and by confocal fluorescence microscopy (b,d) (PSPMA-Fluorescence). Because the core coacervates were not prepared at a high salt concentration before mixing with the other coacervates and lowering the salt concentration in this method, the cores appear more gel-like and irregular in shape than with method 2.

## Mean-field theory of complex coacervates

The mean-field free energy density of a mixture of two components is given by:

$$\frac{F}{kT} = \frac{\phi}{N_1} \ln \phi + \frac{1-\phi}{N_2} \ln(1-\phi) + \chi \phi(1-\phi) \quad (\text{S1})$$

where the Flory interaction parameter  $\chi$  is a measure for the interaction strength between the two components, relative to their self-interaction. Beyond a critical value of  $\chi$ , phase separation occurs, and the binodal concentrations can be found from a common tangent construction, close to the spinodal points ( $\partial^2 F / \partial \phi^2 = 0$ ).

In a symmetric mixture of polymers ( $N_1=N_2=N$ ) in a single solvent, the tangent is horizontal, and the binodal concentrations are given by the implicit relation, under the assumption that both phases are equally hydrated:<sup>10</sup>

$$\chi_b N = - \frac{\ln(\phi) - \ln(1-\phi_w-\phi)}{(1-\phi_w-2\phi)} \quad (\text{S2})$$

Figure S12 shows the binodal concentrations calculated by Eq. S2 for two coexisting polymer solutions with a common solvent (e.g., aqueous two-phase system, or two coacervates). The segregation between the two phases increases with increasing  $\chi$  (stronger interactions) up to a volume fraction of  $(1 - \phi_w)$  of each polymer in their respective phases.

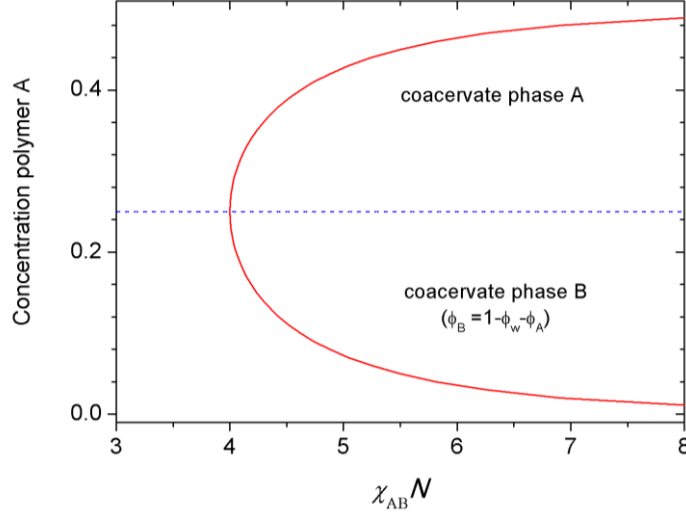

**Figure S12.** The binodal concentrations of two coexisting coacervates change with interaction parameter  $\chi$ , for an equal degree of hydration of  $\phi_w = 0.5$ .

The interfacial tension also increases with increasing  $\chi$  away from the critical point as:<sup>4</sup>

$$\gamma \propto (\chi - \chi_c)^{3/2} \quad (\text{S3})$$

For complex coacervation, the Flory-Huggins framework has been extended by Voorn and Overbeek with a Debye-Hückel approximation for the electrostatic interaction between oppositely charged species.<sup>11-12</sup> For complex coacervates composed of polymers of equal length ( $N$ ) at a 1:1 charge ratio, the phase behaviour can be mapped onto the Flory-Huggins theory for a polymer in solution, by defining an effective interaction parameter:<sup>12</sup>

$$\chi_{\text{eff}} = \chi_r + \frac{\sqrt{\pi}}{3\sqrt{2}N_{\text{Av}}} \frac{\sigma^2}{\sqrt{c_s}} \left( \frac{\sqrt{l_B}}{l} \right)^3 \quad (\text{S4})$$

where  $l$  is the lattice size,  $l_B$  the Bjerrum length,  $\sigma$  the charge density,  $c_s$  the ionic strength (in mM), and  $\chi_r$  the residual, non-electrostatic part of the interaction parameter. The critical salt concentration  $c_s^*$  can be found by combining equation (S4) above and the expression for the critical  $\chi_c$  of a polymer in solution:  $\chi_c = \frac{1}{2} + \frac{1}{\sqrt{N}}$ , resulting in:<sup>12</sup>

$$c_s^* = \frac{\pi}{18N_{\text{Av}}} \left( \frac{l_B}{l^2} \right)^3 \frac{\sigma^4}{\left( \frac{1}{2} + \frac{1}{\sqrt{N}} - \chi_r \right)^2} \quad (\text{S5})$$

$$\chi_{\text{eff}} = \frac{1}{2} + \frac{1}{\sqrt{N}} + \frac{\sqrt{\pi} \sigma^2}{3\sqrt{2}N_{\text{Av}}} \left( \frac{\sqrt{l_B}}{l} \right)^3 \left( \frac{1}{\sqrt{c_s}} - \frac{1}{\sqrt{c_s^*}} \right) \quad (\text{S6})$$

According to these equations, the higher the critical salt concentration of a complex coacervate, the larger its effective interaction parameter, and the larger its density and interfacial tension at a given salt concentration (as shown in Figure S13).

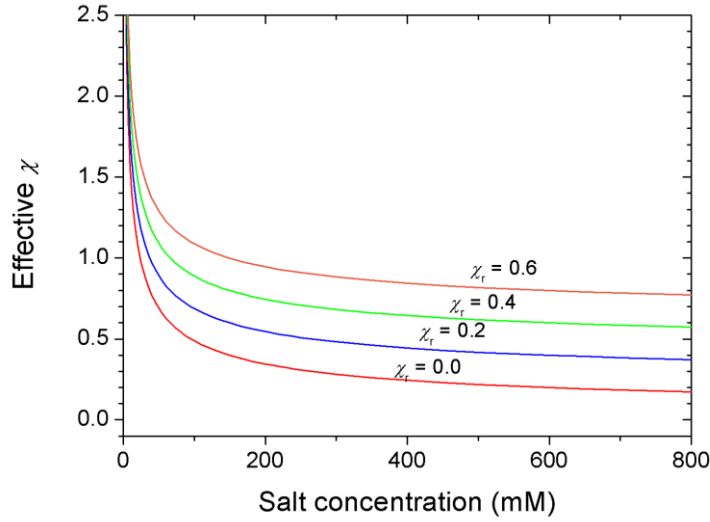

**Figure S13.** The relationship of effective interaction parameter  $\chi$  with salt concentration.

Finally, the effective interaction between two coexisting coacervates,  $\chi_{12}$ , can be approximated using an expression for the polymer-polymer interaction in phase separated solutions (see main text), which ultimately results in:

$$\chi_{12} \approx \frac{\pi\sigma^4}{36N_{Av}} \left(\frac{l_B}{l^2}\right)^3 \left(\frac{1}{\sqrt{c_1^*}} - \frac{1}{\sqrt{c_2^*}}\right)^2 \approx 0.1 \left(\frac{1}{\sqrt{c_1^*}} - \frac{1}{\sqrt{c_2^*}}\right)^2 \quad (S7)$$

where the second approximation is valid for strongly charged polyelectrolytes ( $\sigma \approx 1$ ), and the parameters used in Ref. 12.  $C_1^*$  and  $C_2^*$  are the two critical salt concentrations in mol/L.

## Supplementary movies

**Movie S1.** Fusion of core PAA/PLys(Me)<sub>3</sub> coacervates inside a PAA/GFP-K<sub>72</sub> outer phase (Figure 2a), 6x real time.

**Movie S2.** Fusion of PGlu/PDDA coacervates followed by fusion of their internal PGlu/PAH cores (Figure 2b), 2.5x real time.

**Movie S3.** Fusion of PSPMA/PDDA coacervates inside a PSPMA/Q-Dex coacervate, 2.5x real time.

**Movie S4.** Engulfing of an ATP/PAH coacervate by a PSPMA/PDDA coacervate (Figure 2c), 2x real time.

**Movie S5.** Fusion of intermediate PSPMA/PDDA coacervates inside a PAA/PDDA coacervate, followed by fusion of the inner ATP/PAH core coacervates (Figure 6a-b), 2.5x real time.

## Supplementary references

1. Wang, F.; Zhang, D.; Duan, C.; Jia, L.; Feng, F.; Liu, Y.; Wang, Y.; Hao, L.; Zhang, Q., Preparation and characterizations of a novel deoxycholic acid–O-carboxymethylated chitosan–folic acid conjugates and self-aggregates. *Carbohydrate polymers* **2011**, *84* (3), 1192-1200.
2. Granados, E. N.; Bello, J., Alkylated poly(amino acids). I. Conformational properties of poly(N<sup>ε</sup>-trimethyl-L-lysine) and poly(N<sup>δ</sup>-trimethyl-L-ornithine). *Biopolymers* **1979**, *18*, 1479-1486.
3. Spruijt, E.; Tusk, S. E.; Bayley, H., DNA scaffolds support stable and uniform peptide nanopores. *Nature nanotechnology* **2018**, *13* (8), 739-745.
4. Spruijt, E.; Sprakel, J.; Cohen Stuart, M. A.; van der Gucht, J., Interfacial tension between a complex coacervate phase and its coexisting aqueous phase. *Soft Matter* **2010**, *6* (1), 172-178.
5. Cheng, J.; Deming, T. J., Synthesis of polypeptides by ring-opening polymerization of alpha-amino acid N-carboxyanhydrides. *Top Curr Chem* **2012**, *310*, 1-26.
6. Kalaska, B.; Kaminski, K.; Sokolowska, E.; Czaplicki, D.; Kujdowicz, M.; Stalinska, K.; Bereta, J.; Szczubialka, K.; Pawlak, D.; Nowakowska, M.; Mogielnicki, A., Nonclinical evaluation of novel cationically modified polysaccharide antidotes for unfractionated heparin. *PLoS One* **2015**, *10* (3), e0119486.
7. Siewert, C.; Haas, H.; Nawroth, T.; Ziller, A.; Nogueira, S. S.; Schroer, M. A.; Blanchet, C. E.; Svergun, D. I.; Radulescu, A.; Bates, F.; Huesemann, Y.; Radsak, M. P.; Sahin, U.; Langguth, P., Investigation of charge ratio variation in mRNA - DEAE-dextran polyplex delivery systems. *Biomaterials* **2019**, *192*, 612-620.
8. Usher, T. C.; Patel, N., Manufacture of diethylaminoethyl dextrans. **1985**.
9. Te Brinke, E.; Groen, J.; Herrmann, A.; Heus, H. A.; Rivas, G.; Spruijt, E.; Huck, W. T. S., Dissipative adaptation in driven self-assembly leading to self-dividing fibrils. *Nature Nanotechnology* **2018**, *13* (9), 849-855.
10. Rubinstein, M.; Colby, R. H. *Polymer physics*; Oxford University Press: New York, **2003**, pp 140-154.
11. Overbeek, J. T. G.; Voorn, M. J., Phase separation in polyelectrolyte solutions. Theory of complex coacervation. *Journal of Cellular and Comparative Physiology* **1957**, *49*, 7-26.
12. Spruijt, E.; Westphal, A. H.; Borst, J. W.; Cohen Stuart, M. A.; van der Gucht, J., Binodal Compositions of Polyelectrolyte Complexes. *Macromolecules* **2010**, *43* (15), 6476-6484.
